# Supplementary material for: Food, flavouring and feed plant traditions in the Tyrrhenian sector of Basilicata, Italy
Source: J Ethnobiol Ethnomed. 2006 Sep 7;2:37. doi: 10.1186/1746-4269-2-37 (PMC1592457; doi:10.1186/1746-4269-2-37)
Supplement: Additional File 1 — Food, flavouring and feed folk uses of plants in the Tyrrhenian sector of Basilicata, Italy. Among the taxa listed 44 are used as food or flavouring and 22 for animal alimentation; 7 taxa are involved in rituals especially connected with agriculture and plant growth. [file 1746-4269-2-37-S1.pdf]

**Table 1. Food, flavouring and feed folk uses of plants in the Tyrrhenian sector of Basilicata, Italy**

| <i>Scientific name<br/>(voucher specimen)</i>                                           | <i>Local names</i>           | <i>Parts<br/>used</i> | <i>Preparation</i>                                                 | <i>Popular uses</i>                                 | <i>Citations<br/>N°</i> | <i>%</i>    | <i>Fre-<br/>quen-<br/>cy</i> | <i>Current<br/>use</i> | <i>Users</i> | <i>Gathe-<br/>ring</i> | <i>Habi-<br/>tat</i> |
|-----------------------------------------------------------------------------------------|------------------------------|-----------------------|--------------------------------------------------------------------|-----------------------------------------------------|-------------------------|-------------|------------------------------|------------------------|--------------|------------------------|----------------------|
| Pteridophyta Equisetaceae                                                               |                              |                       |                                                                    |                                                     |                         |             |                              |                        |              |                        |                      |
| <i>Equisetum telmateja</i><br>Ehrh. M1                                                  | Coda cavallina               | Bu                    | Boiled buds                                                        | As food                                             | 1                       | 0,3         | R                            | No                     | F,O          | Sp                     | Da                   |
| Angiospermae Dicotyledones                                                              |                              |                       |                                                                    |                                                     |                         |             |                              |                        |              |                        |                      |
| Salicaceae                                                                              |                              |                       |                                                                    |                                                     |                         |             |                              |                        |              |                        |                      |
| <i>Salix alba</i> L.* M2                                                                | Salecòne                     | Br                    | Fresh branches                                                     | Fodder to strengthen young rabbits (2-3 months old) | 2                       | 0,59        | R                            | Yes                    | P,F,O        | Al                     | Ri                   |
| Juglandaceae                                                                            |                              |                       |                                                                    |                                                     |                         |             |                              |                        |              |                        |                      |
| <i>Juglans regia</i> L.° M3                                                             | Noce                         | Hu                    | Macerated in alcool                                                | Flavouring to make the liqueur 'nocino'             | 4                       | 1,19        | C                            | Yes                    | P,F,O        | Su                     | Cu                   |
| Fagaceae                                                                                |                              |                       |                                                                    |                                                     |                         |             |                              |                        |              |                        |                      |
| <i>Quercus ilex</i> L.* M4                                                              | Ìlece, elce                  | Fru                   | Fresh or dried fruits                                              | Fodder for pigs                                     | 7                       | 2,08        | C                            | Yes                    | P,F,O        | Fa                     | Tewo                 |
| <i>Quercus virgiliana</i><br>(Ten.) Ten.° M5,<br><i>Quercus pubescens</i><br>Willd.° M6 | Cerza, cersa<br>Cerza, cersa | Fru<br>Fru            | Roasted fruits<br>Fresh or dried fruits                            | To make a substitute of coffee<br>Fodder for pigs   | 1<br>7                  | 0,3<br>2,08 | R<br>Vc                      | No<br>Yes              | F,O<br>P,F,O | Fa<br>Fa               | Tewo                 |
| Moraceae                                                                                |                              |                       |                                                                    |                                                     |                         |             |                              |                        |              |                        |                      |
| <i>Ficus carica</i> L.° M7                                                              | Ficàra                       | Fru                   | Fresh fruits boiled and strained to obtain a food similar to honey | As food                                             | 2                       | 0,59        | R                            | Yes                    | F            | Su                     | Cu                   |
|                                                                                         |                              | Fru                   | Dried figs kept in wooden cases with <i>L. nobilis</i> leaves      | As food                                             | 3                       | 0,89        | C                            | No                     | F,O          | Fa, Wi                 |                      |

## Urticaceae

|                                        |        |     |                                    |                                 |   |      |   |     |     |    |         |
|----------------------------------------|--------|-----|------------------------------------|---------------------------------|---|------|---|-----|-----|----|---------|
| <i>Urtica dioica</i> Mert. et Koch° M8 | Ardica | Le, | Crushed or boiled, mixed with bran | Fodder for chickens and turkeys | 4 | 1,19 | C | Yes | F,O | Al | Unc, Ru |
|                                        |        | To  | In omelettes                       | As food                         | 3 | 0,89 | C | Yes | F   | Al |         |

## Chenopodiaceae

|                                                   |       |    |                                  |         |   |      |    |     |       |    |    |
|---------------------------------------------------|-------|----|----------------------------------|---------|---|------|----|-----|-------|----|----|
| <i>Beta vulgaris</i> subsp. <i>vulgaris</i> L. M9 | Bieta | Le | Cooked as a vegetable in "misca" | As food | 4 | 1,19 | Vc | Yes | P,F,O | Sp | Cu |
|---------------------------------------------------|-------|----|----------------------------------|---------|---|------|----|-----|-------|----|----|

## Portulacaceae

|                                  |                    |    |                 |         |   |      |   |     |     |    |      |
|----------------------------------|--------------------|----|-----------------|---------|---|------|---|-----|-----|----|------|
| <i>Portulaca oleracea</i> L. M10 | Purchiacca, vritti | To | In mixed salads | As food | 5 | 1,48 | C | Yes | F,O | Al | Kigd |
|----------------------------------|--------------------|----|-----------------|---------|---|------|---|-----|-----|----|------|

## Ranunculaceae

|                                |                     |    |                                                           |         |    |      |   |     |       |    |        |
|--------------------------------|---------------------|----|-----------------------------------------------------------|---------|----|------|---|-----|-------|----|--------|
| <i>Clematis vitalba</i> L. M11 | Turtagne, vitacchia | Bu | Boiled /fried lightly in olive oil or cooked in omelettes | As food | 15 | 4,46 | C | Yes | P,F,O | Sp | He, Ma |
|--------------------------------|---------------------|----|-----------------------------------------------------------|---------|----|------|---|-----|-------|----|--------|

## Lauraceae

|                              |       |    |                                                                                          |            |   |      |    |     |     |    |        |
|------------------------------|-------|----|------------------------------------------------------------------------------------------|------------|---|------|----|-----|-----|----|--------|
| <i>Laurus nobilis</i> L. M12 | Lauro | Le | In dry figs, fried in oil, with meat or to wrap 'fegatelli' in gelatine / with anchovies | Flavouring | 6 | 1,78 | Vc | Yes | P,F | Al | Cu; Da |
|------------------------------|-------|----|------------------------------------------------------------------------------------------|------------|---|------|----|-----|-----|----|--------|

## Papaveraceae

|                                                     |                    |    |                                         |                                               |   |      |    |     |     |    |    |
|-----------------------------------------------------|--------------------|----|-----------------------------------------|-----------------------------------------------|---|------|----|-----|-----|----|----|
| <i>Papaver rhoeas</i> L. subsp. <i>rhoeas</i> ° M13 | Papavero, paparina | Le | In soups                                | Food to provoke sleep                         | 1 | 0,3  | R  | No  | F   | Sp | Fi |
|                                                     |                    | Le | As a cooked vegetable                   | As food in "misca"                            | 1 | 0,3  | Vc | Yes | P,F | Sp |    |
|                                                     |                    | Le | Mixed with bran                         | As fodder for chickens and rabbits            | 2 | 0,59 | R  | Yes | F   | Sp |    |
|                                                     |                    | Fl | For floral "carpets" or to throw on the | Ritual use (for the Corpus Domini procession) | 4 | 1,19 | Vc | Yes | F,O | Sp |    |

procession

Cruciferae

|                                 |              |      |                           |                 |   |      |   |     |       |       |    |
|---------------------------------|--------------|------|---------------------------|-----------------|---|------|---|-----|-------|-------|----|
| <i>Nasturtium officinale</i> R. | Crisciumuli, | To   | In salad                  | As food         | 6 | 1,78 | C | Yes | P,F,O | Sp,Su | Da |
| Br.° M14                        | crisciune    | Ae p | Fresh or dry aerial parts | Fodder for pigs | 2 | 0,59 | C | Yes | P,F,O | Sp,Su |    |

Rosaceae

|                                        |                                |     |                       |                 |   |      |    |     |       |      |               |
|----------------------------------------|--------------------------------|-----|-----------------------|-----------------|---|------|----|-----|-------|------|---------------|
| <i>Crataegus monogyna</i> Jacq.° M15   | Spina cerasola spina di piruna | Fru | Fresh or dry fruits   | Fodder for pigs | 3 | 0,89 | R  | No  | P,F,O | Fall | Ma, Wo        |
| <i>Fragaria vesca</i> L.° M16          | Fragola                        | Fru | Fresh fruits          | As food         | 4 | 1,19 | C  | Yes | P,F,O | Sp   | Cle           |
| <i>Mespilus germanica</i> L. M17       | Nespolo                        | Fru | Fresh fruits          | As food         | 1 | 0,3  | R  | Yes | P,F,O | Wi   | Cu            |
| <i>Pyrus amygdaliformis</i> Vill.° M18 | Pirànio                        | Fru | Fresh or dry fruits   | Fodder for pigs | 1 | 0,3  | R  | No  | P,F,O | Wi   | Ma            |
| <i>Rubus ulmifolius</i> Schott° M19    | Spina, cèusa spina             | Fru | Fresh fruits          | As food         | 3 | 0,89 | Vc | Yes | P,F,O | Su   | Scr, Cle (Wo) |
| <i>Sorbus domestica</i> L. M20         | Survi, sùgoro                  | Fru | Fresh or dried fruits | As food         | 2 | 0,59 | R  | No  | P,F,O | Wi   | Wo            |

Leguminosae

|                                                                         |         |     |                       |                                |    |      |   |     |       |    |       |
|-------------------------------------------------------------------------|---------|-----|-----------------------|--------------------------------|----|------|---|-----|-------|----|-------|
| <i>Ceratonia siliqua</i> L.° M21                                        | Carrubo | Se  | Dried seeds           | As food                        | 5  | 1,48 | C | Yes | P,F,O | Al | Mema, |
|                                                                         |         | Fru | Fresh or dried fruits | Fodder for livestock           | 17 | 5,06 | C | Yes | F,O   | Su | Co    |
| <i>Cicer arietinum</i> L. M22                                           | Cece    | Se  | Roasted               | To make a substitute of coffee | 2  | 0,59 | C | No  | F,O   | Al | Cu    |
| <i>Pisum sativum</i> L. subsp. <i>elatius</i> (Bieb.) Asch. et Gr.* M23 | Oleca   | Se  | Tender seeds in soups | Food use                       | 2  | 0,59 | R | No  | O     | Su | Unc   |

|                                                         |                                             |         |                                                                                     |                                               |    |      |    |     |       |        |             |
|---------------------------------------------------------|---------------------------------------------|---------|-------------------------------------------------------------------------------------|-----------------------------------------------|----|------|----|-----|-------|--------|-------------|
| <i>Psoralea bituminosa</i> L.* M24                      | Occhio di vojo                              | Ae p    | Fresh plant or put in the hay                                                       | Fodder for cows                               | 4  | 1,19 | Vc | Yes | P,F,O | Sp, su | Rock, Suunc |
| <i>Spartium junceum</i> L.* M25                         | Spartu                                      | St      | Fresh stems                                                                         | Fodder for rabbits                            | 4  | 1,19 | Vc | Yes | P,F,O | Al     | Unc,        |
|                                                         |                                             | Fl      | Flowers thrown on the procession; floral carpets                                    | Ritual use (for the Corpus Domini procession) | 7  | 2,08 | C  | Yes | F,O   | Sp, su | Shr         |
| Rhamnaceae                                              |                                             |         |                                                                                     |                                               |    |      |    |     |       |        |             |
| <i>Ziziphus jujuba</i> Mill.M26                         | Jujulu                                      | Fru     | Fresh fruits                                                                        | As food                                       | 2  | 0,59 | R  | Yes | P,F,O | Su     | Cu          |
| Myrtaceae                                               |                                             |         |                                                                                     |                                               |    |      |    |     |       |        |             |
| <i>Myrtus communis</i> L.° M27 Umbelliferae             | Murtidda, mortedda                          | Br (wo) | As skewers for preserving and pressing figs                                         | Flavouring                                    | 3  | 0,89 | C  | Yes | P,F,O | Fa     | Mema        |
| <i>Crithmum maritimum</i> L.* M28                       | Crìtini                                     | To      | In salad                                                                            | As food                                       | 4  | 1,19 | C  | No  | P,F,O | Al     | Sero        |
| <i>Foeniculum vulgare</i>                               |                                             | Le      | As a cooked vegetable                                                               | As food in "misca"                            | 7  | 2,08 | Vc | Yes | P,F,O | Al     | Esc,        |
| Miller subsp. (Ucria) Coutinho° M29<br><i>piperitum</i> | Finocchio selvatico,                        | Fru     | In olives, sausages with pepper/chili, tomato sauce                                 | Flavouring                                    | 12 | 3,57 | Vc | Yes | P,F,O | Su     | Unc         |
|                                                         | finucchiello, finocchietto finucchio,       | Le      | With sauge leaves, in pasta with sardines, in soups, in "ciambotta" and with rabbit | Flavouring                                    | 5  | 1,48 | Vc | Yes | F,O   | Sp     |             |
|                                                         |                                             | Ae p    | Fresh aerial part                                                                   | Fodder for rabbits                            | 2  | 0,59 | C  | Yes | O     | Sp     |             |
| Ericaceae                                               |                                             |         |                                                                                     |                                               |    |      |    |     |       |        |             |
| <i>Arbutus unedo</i> L. M30                             | Sorve nataline, sorve selvagge survu pelusu | Fru     | Fresh fruits                                                                        | As food                                       | 3  | 0,89 | R  | Yes | P,F,O | Wi     | Mema        |

# Oleaceae

|                                  |                     |           |                                           |                                           |   |      |    |     |       |          |    |
|----------------------------------|---------------------|-----------|-------------------------------------------|-------------------------------------------|---|------|----|-----|-------|----------|----|
| <i>Fraxinus ornus</i> L.°<br>M31 | Milègro,<br>Melègro | Br,<br>le | Fresh leaves / branches                   | Fodder for goats                          | 5 | 1,48 | C  | Yes | F,O   | Sp,su,fa | Wo |
| <i>Olea europaea</i> L.°<br>M32  | Palma<br>benedetta  |           | A small branch is<br>placed in the fields | Magic-religious use (to remove<br>storms) | 4 | 1,19 | Vc | Yes | P,F,O | Sp       | Cu |

# Boraginaceae

|                                     |          |           |                                                              |                 |    |      |    |     |       |       |            |
|-------------------------------------|----------|-----------|--------------------------------------------------------------|-----------------|----|------|----|-----|-------|-------|------------|
| <i>Borago officinalis</i> L.<br>M33 | Vurrania | Le,<br>to | In fritters, in “misca”,<br>in soups, with<br>“sanguinaccio” | As food         | 20 | 5,95 | Vc | Yes | P,F,O | Sp,Wi | Unc,<br>Cu |
|                                     |          | Ae p      | Fresh aerial parts                                           | Fodder for pigs | 3  | 0,89 | C  | Y   | P,F,O | Sp    |            |

# Labiatae

|                                                                           |                    |      |                                                               |                                    |   |      |    |     |       |    |             |
|---------------------------------------------------------------------------|--------------------|------|---------------------------------------------------------------|------------------------------------|---|------|----|-----|-------|----|-------------|
| <i>Mentha x piperita</i> L.<br>M34                                        | Menta              | Le   | Fresh/dry (e.g. fried<br>fish with boiled<br>vinegar /garlic) | Flavouring                         | 4 | 1,19 | C  | Yes | F,O   | Al | Da          |
| <i>Origanum<br/>heracleoticum</i> L.°<br>M35                              | Rìgono,<br>arìgano | Fl t | Dry minced flowery<br>tops                                    | Flavouring                         | 6 | 1,78 | Vc | Yes | P,F,O | Su | Moga        |
| <i>Satureja montana</i> L.<br>M36                                         | Sarapuddu          | Ae p | Dry minced flowery<br>tops                                    | Flavouring for boiled meats (goat) | 1 | 0,3  | R  | Yes | F,O   | Al | Moga        |
| <i>Teucrium polium</i> L.<br>subsp. <i>capitatum</i><br>(L.) Arcang.* M37 |                    | Ae p | Fresh/dry minced<br>flowery tops                              | Flavouring                         | 1 | 0,3  | R  | No  | O     | Al | Drpa,<br>Ga |

# Plantaginaceae

|                                  |            |    |                 |                        |   |     |   |    |   |    |        |
|----------------------------------|------------|----|-----------------|------------------------|---|-----|---|----|---|----|--------|
| <i>Plantago major</i><br>L.° M38 | Centonerve | Se | Fresh/dry seeds | Fodder for goldfinches | 1 | 0,3 | C | No | O | Su | Unc,Me |
|----------------------------------|------------|----|-----------------|------------------------|---|-----|---|----|---|----|--------|

# Compositae

|                                       |         |    |                                   |         |    |      |    |     |       |    |            |
|---------------------------------------|---------|----|-----------------------------------|---------|----|------|----|-----|-------|----|------------|
| <i>Cichorium intybus</i><br>L.<br>M39 | Cicoria | Le | As cooked vegetable in<br>“misca” | As food | 11 | 3,27 | Vc | Yes | P,F,O | Al | Unc,<br>Cu |
|---------------------------------------|---------|----|-----------------------------------|---------|----|------|----|-----|-------|----|------------|

|                                                                                                                                                |                                           |      |                                             |                                 |   |      |    |     |       |       |                          |
|------------------------------------------------------------------------------------------------------------------------------------------------|-------------------------------------------|------|---------------------------------------------|---------------------------------|---|------|----|-----|-------|-------|--------------------------|
| <i>Helichrysum italicum</i> (Roth)<br>G.Don fil.* M40                                                                                          |                                           | Ae p | Fresh/dry minced aerial parts               | Flavouring for sauces           | 1 | 0,3  | R  | No  | F,O   | Su    | Ga                       |
| <i>Inula crithmoides</i> L.*<br>M41                                                                                                            | Critini                                   | To   | In salad                                    | As food                         | 4 | 1,19 | C  | No  | F,O   | Al    | Sero                     |
| <i>Picris echioides</i> L.<br>M42                                                                                                              | Purcinara<br>Purcinara                    | Le   | Cooked in "misca", frequently in wartime    | As food                         | 3 | 0,89 | Vc | Yes | P,F,O | Sp    | Cu,<br>Unc               |
| <i>P. hieracioides</i> L.<br>M43                                                                                                               |                                           | Ae p | Fresh aerial parts                          | Galactagogue fodder for rabbits | 1 | 0,3  | R  | Yes | P,F,O | Al    |                          |
|                                                                                                                                                |                                           | Ae p | Fresh aerial parts                          | Fodder for pigs                 | 2 | 0,59 | C  | Yes | P,F,O | Al    |                          |
| <i>Reichardia picroides</i> (L.)<br>Roth° M44                                                                                                  | Galazzina,<br>grattalingua,<br>lattucetta | Le   | As cooked vegetable                         | As food in "misca"              | 3 | 0,89 | C  | Yes | P,F,O | Sp    | Uncdr,                   |
|                                                                                                                                                |                                           | Le   | In soups                                    | As food                         | 2 | 0,59 | Vc | Yes | P     | Sp    | Wa                       |
|                                                                                                                                                |                                           | Ae p | Fresh aerial parts                          | Fodder for rabbits              | 2 | 0,59 | C  | Yes | F,O   | Al    |                          |
| <i>Sonchus</i> sp.pl. ( <i>S. arvensis</i> L.° M45, <i>S. asper</i> (L.) Hill° M46, <i>S. oleraceus</i> L.* M47, <i>S. tenerrimus</i> L.* M48) | Juncia, junci                             | Le   | As cooked vegetable in "misca" and in soups | As food                         | 9 | 2,67 | Vc | Yes | P,F,O | Al    | Unc,<br>Cu; Wa           |
|                                                                                                                                                |                                           | Le   | Salads                                      | As food                         | 2 | 0,59 | R  | Yes | F     | Sp    | ( <i>S. tenerrimus</i> ) |
| <i>Tussilago farfara</i> L.<br>M49                                                                                                             | Ugna                                      | Ae p | Minced aerial part                          | Fodder for pigs (with bran)     | 4 | 1,19 | C  | No  | P,F,O | Sp-Fa | Dacl                     |
| <i>Urospermum picroides</i> (L.) Scop.<br>ex F.W. Schmidt<br>M50                                                                               | Erba piatta                               | Le   | As cooked vegetable in "misca" and in soups | As food                         | 1 | 0,3  | R  | Yes | P     | Wi,Sp | Unc,<br>Cu               |

# Angiospermae Monocotyledones

## Liliaceae

|                                                          |              |      |                                                                                          |                                                                           |    |      |    |     |       |    |               |
|----------------------------------------------------------|--------------|------|------------------------------------------------------------------------------------------|---------------------------------------------------------------------------|----|------|----|-----|-------|----|---------------|
| <i>Asparagus acutifolius</i><br>L. M51                   | Spàragi      | Tur  | In omelettes, boiled, in<br>"pasta"                                                      | As food                                                                   | 10 | 2,97 | Vc | Yes | P,F,O | Sp | Mema,<br>Tewo |
| <i>Asphodelus<br/>microcarpus</i> Salzm.<br>et Viv.* M52 | Sciòddule;   | Tub  | Fresh/dry tubers                                                                         | Fodder for pigs                                                           | 1  | 0,3  | C  | No  | F,O   | Al | Ga, Pa        |
|                                                          | catània (the | Le   | Fresh/dry leaves                                                                         | Fodder for cows and goats                                                 | 3  | 0,89 | C  | No  | F,O   | Al |               |
|                                                          | flowers)     | Ae p | The abundant<br>flowering is<br>interpreted as good<br>future harvests in<br>agriculture | Ritual use (to make omens)                                                | 1  | 0,3  | C  | Yes | P,F,O | Sp |               |
| <i>Asphodeline<br/>liburnica</i><br>(Scop.) Rchb.* M53   | Sbaràvule    | Bu   | In omelettes and in<br>batter (fritters)                                                 | As food                                                                   | 5  | 1,48 | R  | No  | P,F,O | Sp | Drro          |
| <i>Leopoldia comosa</i><br>(L.)<br>Parl.° M54            | Cipuddini    | Bul  | In omelettes; fried with<br>bacon, potatoes, pig's<br>fat                                | As food (bulbs flavoured with<br>garlic, chilli pepper, mint,<br>oregano) | 10 | 2,97 | C  | Yes | P,F,O | Sp | Uncdr         |
|                                                          |              | Bul  | Boiled, baked with<br>lamb                                                               | As food (for the seasoning see<br>above)                                  | 8  | 2,37 | R  | Yes | P,F,O | Sp |               |
|                                                          |              | Le   | In omelettes                                                                             | As food                                                                   | 1  | 0,3  | Vc | Yes | P,F   | Sp |               |

## Graminaceae

|                                                 |                                 |      |                             |                                            |   |      |    |     |       |    |            |
|-------------------------------------------------|---------------------------------|------|-----------------------------|--------------------------------------------|---|------|----|-----|-------|----|------------|
| <i>Cynodon dactylon</i><br>(L.)<br>Pers.* M55   | Gramigna                        | Rh   | Crushed to extract<br>flour | In times of famine added to wheat<br>flour | 1 | 0,3  | C  | No  | F,O   | Al | Unc,       |
|                                                 |                                 | Rh   | Boiled                      | As food in times of famine                 | 1 | 0,3  | C  | No  | F,O   | Al | Cu, Ro     |
| <i>Digitaria sanguinalis</i><br>(L.) Scop.* M56 | Pulicastrieddu,<br>p. femmenino | Ae p | Fresh aerial parts          | Fodder for rabbits                         | 5 | 1,48 | C  | Yes | P,F,O | Sp | Unc,<br>Cu |
| <i>Hordeum vulgare</i> L.<br>M57                | Orzo                            | Fru  | Roasted                     | To make a substitute of coffee             | 9 | 2,67 | Vc | No  | F,O   | Al | Cu         |

|                                                                                                                             |                                                |                |                                                                                                                                                   |                                    |        |             |        |            |            |              |               |
|-----------------------------------------------------------------------------------------------------------------------------|------------------------------------------------|----------------|---------------------------------------------------------------------------------------------------------------------------------------------------|------------------------------------|--------|-------------|--------|------------|------------|--------------|---------------|
| <i>Lolium multiflorum</i><br>Lam. subsp. <i>gaudini</i><br>(Parl.) Sch. et Th.*<br>M58, <i>L.</i><br><i>perenne</i> L.* M59 | Gioglio,<br>sciuoglio<br>Gioglio,<br>sciuoglio | Fru,<br>fl, le | The small ears were<br>counted, reciting:<br>"Much, little,<br>nothing" and the last<br>small ear indicated<br>whether a love was<br>reciprocated | Ritual use (for make omens)        | 8      | 2,37        | Vc     | No         | F,O        | Sp,Su,<br>Fa | Unc,<br>Cu    |
| <i>Setaria</i> sp.* M60                                                                                                     | Pulicastrieddu<br>masculino                    | Ae p           | Fresh aerial part                                                                                                                                 | Fodder for cows                    | 1      | 0,3         | R      | No         | P,F        | Sp,su        | Unc,<br>Cu    |
| Araceae                                                                                                                     |                                                |                |                                                                                                                                                   |                                    |        |             |        |            |            |              |               |
| <i>Arum italicum</i><br>Miller*<br>M61                                                                                      | Pizzicuorno,<br>vrai                           | Le<br>Rh       | Cooked leaves<br>Fresh/dry rhizomes                                                                                                               | Fodder for pigs<br>Fodder for pigs | 1<br>5 | 0,3<br>1,48 | R<br>R | Yes<br>Yes | P<br>P,F,O | Al<br>Al     | Ma,<br>He, Cu |
|                                                                                                                             |                                                | Ae<br>p, rh    | Abundant flowers and<br>fruits are an omen of<br>good future in<br>agriculture                                                                    | Ritual use (for omens)             | 3      | 0,89        | R      | Yes        | P,F,O      | Fa-Wi        |               |

**Shortenings (table I):** \* = plant not cited in Caneva et al., 1997; Pieroni et al., 2002a; 2002 b; ° = plant cited in the above mentioned papers but at least one use new or different in comparison with them **Citations** The % is referred to a total number of citations (336) **Parts used** Ae p = aerial part; br = branches; bu = buds; bul = bulb; fl = flowers; fl t = flowery tops; fru = fruits; Hu = husk; rh = rhizomes; se = seeds; st = stems; to = tops; tub = tubers; tur = turiones; wo = wood **Use** C= common; Vc= very common; R= rare **Users** P= personal; F= familiar; O= mentioned by others **Period of gathering** Sp= spring; Su= summer; Fa= fall; Wi= winter; Al=always **Habitat** Cle = Clearings; Co = Coasts; Cu= cultivated areas; Da = damp areas; Dacl = damp clayey areas; Drpa = dry pastures; Drro = dry rocky slopes; Esc = escarpments; Fi = fields; Ga = garrigues; Kigd = kitchen gardens; He = hedges; Ma = maquis; Me = meadows; Mema = Mediterranean maquis; Mewo = mesophilous woods; Moga = mountain garrigues; Pa = pastures; Ri = along rivers; Ro = roadsides; Rock = rocky slopes; Ru = ruins; Scr = scrubland; Sero = sea rocks; Sh = shrubby areas; Suunc = sunny uncultivated areas; Tewo = termophilous woods; Unc = uncultivated areas; Uncdr = uncultivated dry areas; Wa = walls; Wo = woods
